# Supplementary material
Source: Springer Nature journal article supplement (https://www.springermedizin.de/resource/supplementary/12943_2013_1250_MOESM12_ESM.pdf/9553056)

A

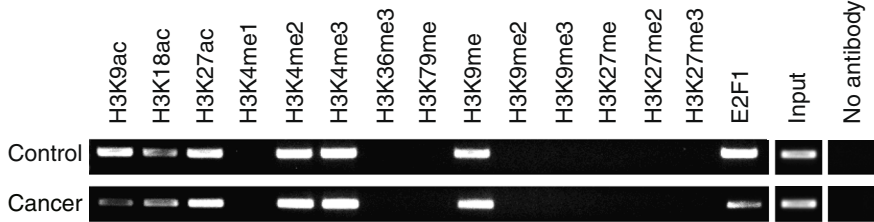

B

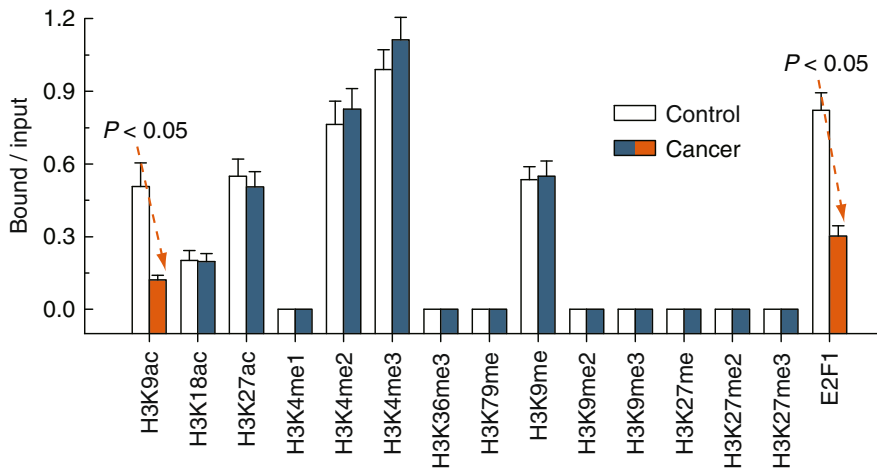

Supplement: MOESM12 [file 9553056]
